# Supplementary material for: Efficient algorithms to discover alterations with complementary functional association in cancer
Source: PubMed Central journal article supplement (PMC6550413; doi:10.1371/journal.pcbi.1006802), 2019-05-23
Supplement: pcbi.1006802.s001.pdf [file pcbi.1006802.s001.pdf]

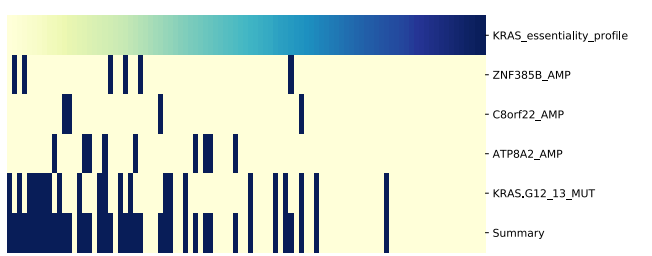

(a) KRAS essentiality: UNCOVER

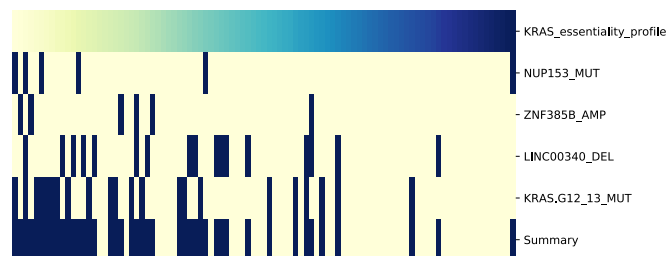

(b) KRAS essentiality: REVEALER

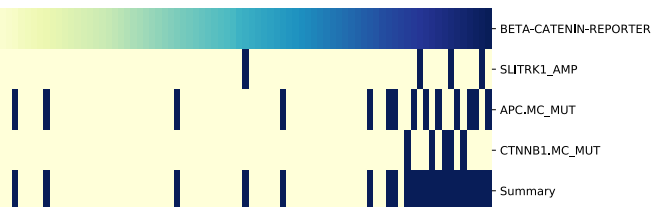

(c) Beta-catenin: UNCOVER

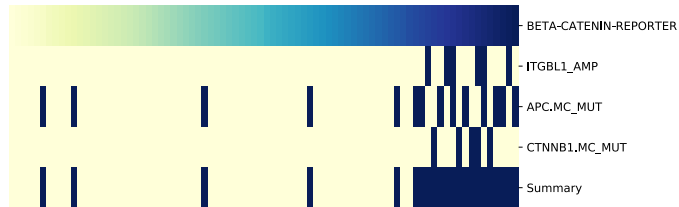

(d) Beta-catenin: REVEALER

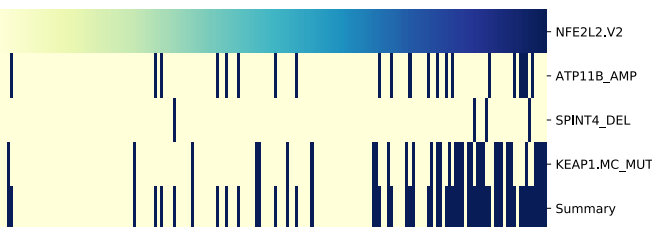

(e) NFE2L2: UNCOVER

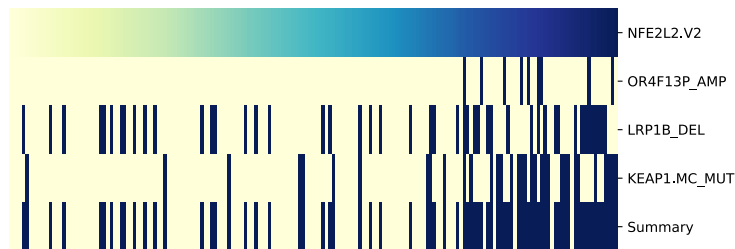

(f) NFE2L2: REVEALER

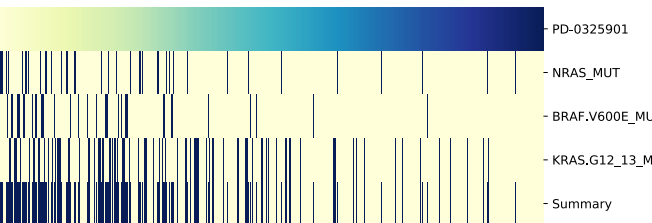

(g) MEK Inhibitor: UNCOVER (ILP)

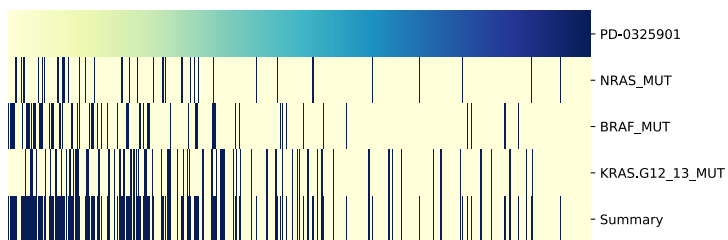

(h) MEK Inhibitor: REVEALER

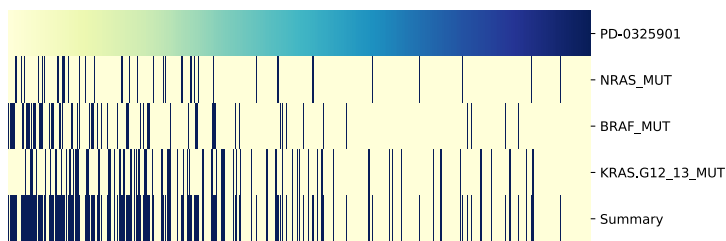

(i) MEK Inhibitor: UNCOVER (Greedy)
