# Supplementary material for: Efficient algorithms to discover alterations with complementary functional association in cancer
Source: PubMed Central journal article supplement (PMC6550413; doi:10.1371/journal.pcbi.1006802), 2019-05-23
Supplement: pcbi.1006802.s002.pdf [file pcbi.1006802.s002.pdf]

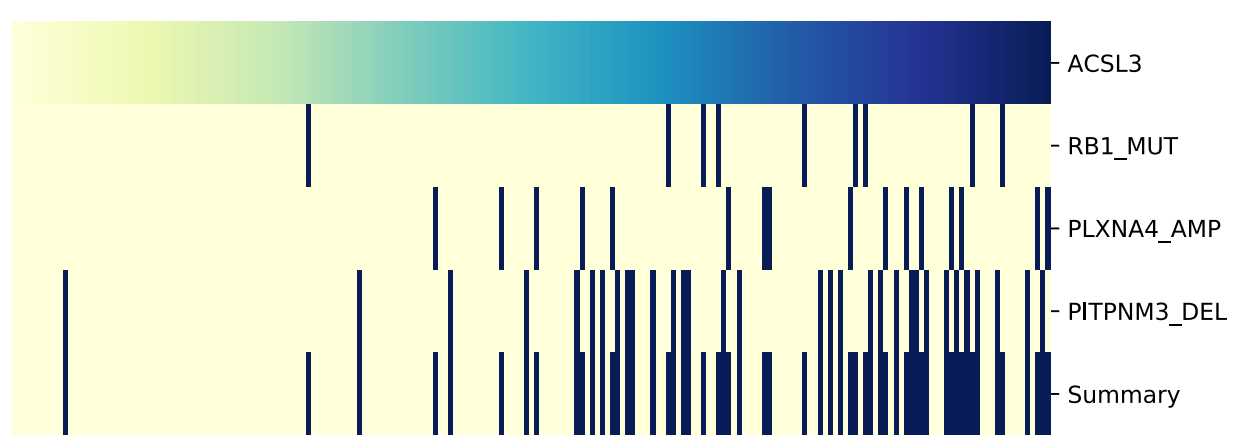

(a) ACSL3

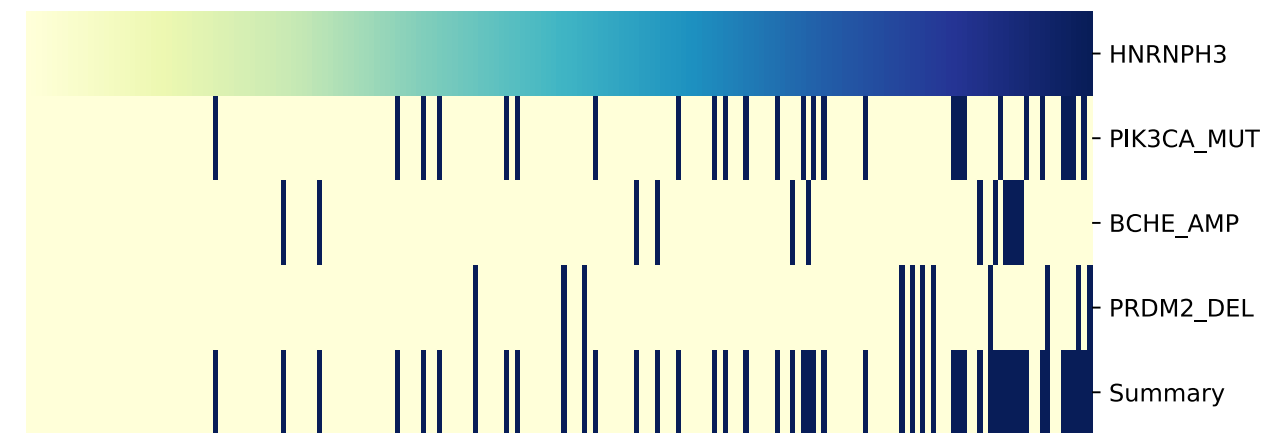

(b) HNRNP3

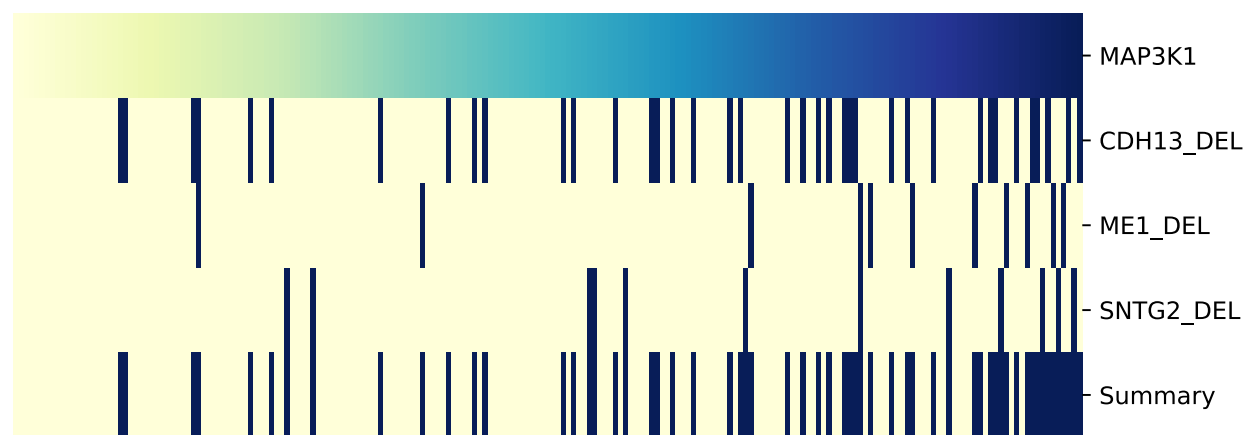

(c) MAP3K1

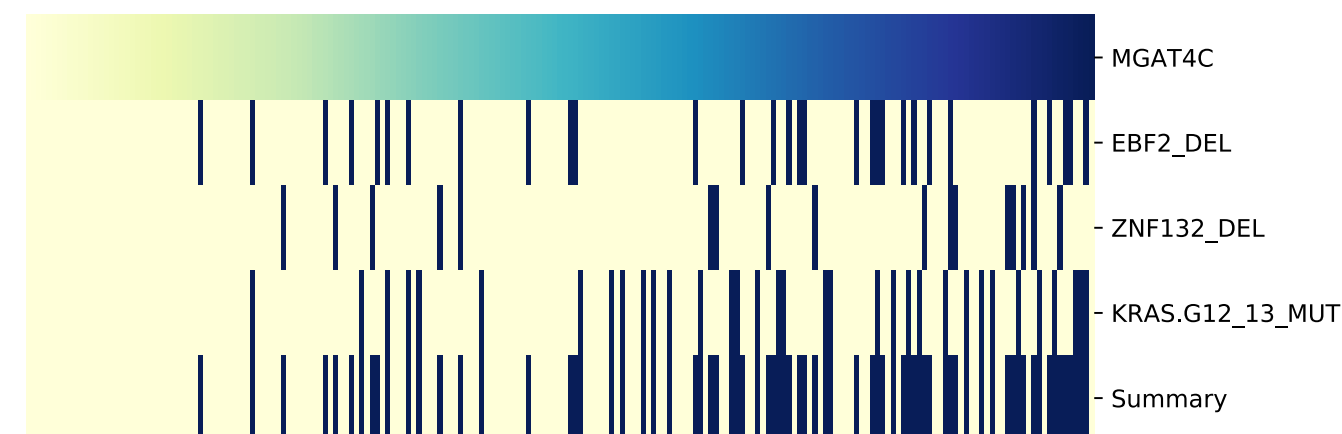

(d) MGAT4C
