# Supplementary material for: Efficient algorithms to discover alterations with complementary functional association in cancer
Source: PubMed Central journal article supplement (PMC6550413; doi:10.1371/journal.pcbi.1006802), 2019-05-23
Supplement: pcbi.1006802.s003.pdf [file pcbi.1006802.s003.pdf]

# Supplementary Text for Efficient Algorithms to Discover Alterations with Complementary Functional Association in Cancer

Rebecca Sarto Basso\*

rebeccasarto@berkeley.edu

Dorit S. Hochbaum\*

hochbaum@ieor.berkeley.edu

Fabio Vandin<sup>†,‡,§,¶</sup>

fabio.vandin@unipd.it

**Proposition 1.** *There are instances of the Target Associated  $k$ -Set such that  $W(\hat{S}) = W(S^*)/k$ .*

*Proof.* To see that the bound is tight just consider the following example. We want to pick  $k$  sets out of  $n$  sets  $A_1 \dots A_n$ . Sets  $A_1 \dots A_k$  include 2 elements of respective weight  $a \geq 0$  and  $b = a/(k-1)$ . Subset  $A_{k+1}$  includes all the elements of weight  $b$  from the previous  $k$  sets and one element with a small weight  $\epsilon$ . Each of the remaining sets  $A_{k+2} \dots A_n$  include an arbitrary number of elements with overall weight  $\leq 0$ . We choose a penalty of value  $a$ . Note that one can choose the weights of elements in sets  $A_{k+2} \dots A_n$  in such a way that the average of all positive normalized weights is equal to  $a$ . Clearly the optimal solution to the Target Associated  $k$ -Set problem consists of sets  $A_1 \dots A_k$  with an objective value of  $k(a+b)$ . The greedy algorithm will pick set  $A_{k+1}$  at the first iteration and then assign a new weight to its elements equal to  $-a$ . The updated weight of sets  $A_1 \dots A_k$  is now 0 and the algorithm will stop and output  $A_{k+1}$  as the solution, giving an approximation ratio of

$$\frac{kb + \epsilon}{k(a+b)} = \frac{1}{k} + \frac{\epsilon}{kb}$$

□

**Proposition 2.** *If  $m \in \Omega(k^2 \ln(n/\delta))$  samples from the generative model above are provided to the greedy algorithm, then the solution of the greedy algorithm is  $H$  with probability  $\geq \delta$ .*

*Proof.* We prove that in iteration  $i$  of the greedy algorithm, conditioning on the current solution being a set  $S$  with  $S \subset H$ , then the greedy algorithm adds a gene in  $H \setminus S$  to the solution with probability  $\geq \delta/k$ , and that the first gene added by the greedy algorithm is  $g \in H$ . The result then follows by union bound on the  $k$  iterations of the greedy algorithm.

Consider the first iteration of the greedy algorithm and consider a gene  $g \in G$ . Note that if  $g \notin H$  then  $\mathbf{E}[W(\{g\})] \leq 0$ , since  $\mathbf{E}[\sum_{j \in A_g} w_j] = 0$  because the samples in which  $g$  is mutated are taken uniformly at random while  $\sum_{j \in A_g} (c_S(j) - 1) \geq 0$ . If  $g \in H$  by the assumptions of the model we have  $\mathbf{E}[W(\{g\})] \geq \frac{m}{kc}$  for a constant  $c''' \geq 1$ . Note that  $W(\{g\})$  can be written as the sum  $\sum_{i=1}^m X_i$  of random variables (r.v.'s)  $X_i$  where  $X_i$  is the contribution of sample  $i$  to  $W(\{g\})$  with  $X_i \in [-1, 1]$ . By the Azuma-Hoeffding

\*Department of Industrial Engineering and Operations Research, University of California at Berkeley (USA).

†Department of Information Engineering, University of Padova (Italy).

‡Department of Computer Science, Brown University (USA).

§Department of Mathematics and Computer Science, University of Southern Denmark (Denmark).

¶Corresponding author.

inequality [?] and union bound (on the  $n$  genes) the first gene chosen by the greedy algorithm is not gene  $g \in H$  with probability  $\leq e^{-\frac{2m^2}{4mk^2(c''')^2}}$  which is  $\leq \delta/k$  when  $m \in \Omega(k^2 \ln(nk/\delta))$ .

Now assume that in iteration  $i$ , for the current solution  $S \subset H$ . Consider a gene  $g \in G \setminus H$ , then  $\mathbf{E}[W(S \cup \{g\}) - W(S)] \leq 0$ , since  $\mathbf{E}[\sum_{j \in U_{s \in S \cup g} A_s} w_j - \sum_{j \in U_{s \in S} A_s} w_j] \leq 0$  (by the assumptions of the model  $W(S) > 0$  and the fact that alterations in  $\{g\}$  are placed uniformly at random among samples) and  $\mathbf{E}[\sum_{j \in U_{s \in S \cup g}} (c_S(j) - 1) - \sum_{j \in U_{s \in S}} (c_S(j) - 1)] \geq 0$  (because for each sample  $i$ , the number of alterations of  $S \cup \{g\}$  in  $i$  is a superset of the number of alterations of  $S$  in  $i$ ). Consider now a gene  $g \in H \setminus S$ : by the assumptions of the model  $\mathbf{E}[W(S \cup \{g\}) - W(S)] \leq \frac{m}{kc'''}$  for a constant  $c''' > 1$ . Note that  $\mathbf{E}[W(S \cup \{g\}) - W(S)]$  can be written as the sum of  $\sum_{i=1}^m X_i$  of random variables (r.v.'s)  $X_i$  where  $X_i$  is the contribution of sample  $i$  in the increase in weight from  $W(S)$  to  $W(S \cup \{g\})$ , where  $X_i \in [-1, 1]$ . By the Azuma-Hoeffding inequality and union bound (on the  $< n$  genes considered for addition by the greedy algorithm) the gene  $g$  added to  $S$  by the greedy algorithm in iteration  $i$  is not in  $H \setminus S$  with probability  $\leq e^{-\frac{2m^2}{4mk^2(c''')^2}}$  which is  $\leq \delta/k$  when  $m \in \Omega(k^2 \ln(nk/\delta))$ .  $\square$
